# Supplementary material for: PIM kinase-responsive microsecond-lifetime photoluminescent probes based on selenium-containing heteroaromatic tricycle
Source: Royal Society of Chemistry journal article supplement (doi:10.1039/c5ra20777k), 2015-01-01
Supplement: c5ra20777k1.pdf [file c5ra20777k1.pdf]

## Supporting Information

### **PIM kinase-responsive microsecond-lifetime photoluminescent probes based on selenium-containing heteroaromatic tricycle**

Ramesh Ekambaram<sup>a</sup>, Ganesh babu Manoharan<sup>a</sup>, Erki Enkvist<sup>a</sup>, Kadri Ligi<sup>a</sup>, Stefan Knapp<sup>b,c</sup>,  
Asko Uri<sup>a\*</sup>

<sup>a</sup> University of Tartu, Institute of Chemistry, 14A Ravila St., Tartu 50411, Estonia

<sup>b</sup> University of Oxford, Nuffield Department of Clinical Medicine, Structural Genomics Consortium, Old Road Campus Research Building, Oxford OX3 7DQ, United Kingdom

<sup>c</sup> Goethe University Frankfurt, Institute for Pharmaceutical Chemistry and Buchmann Institute for Life sciences, Campus Riedberg, 60438 Frankfurt am Main. Germany

\*Corresponding author: Asko Uri, Phone: +372 737 5275, e-mail: asko.uri@ut.ee

### **Content**

|                                         |    |
|-----------------------------------------|----|
| 1. Materials and methods.....           | 2  |
| 2. Synthesis.....                       | 3  |
| 3. Structures and HRMS data.....        | 5  |
| 4. NMR spectra.....                     | 7  |
| 5. HPLC data of purified compounds..... | 11 |
| 6. References.....                      | 11 |

## 1. Materials and methods

Solvents and chemicals were purchased from Rathburn and Sigma-Aldrich. They were used without further purification. Fmoc Rink-amide MBHA resin and Fmoc-protected amino acids for peptide synthesis were purchased from Iris Biotech. Fluorescent dyes PromoFluor-647 NHS ester and PromoFluor-555 ester were purchased from PromoKine.

$^1\text{H}$  and  $^{13}\text{C}$  NMR spectra were taken on spectrometers Bruker AC 200P (200 MHz) and Bruker Ascend (700 MHz). High-resolution mass spectra of all synthesized compounds were measured on Thermo Electron LTQ Orbitrap mass spectrometer. NanoDrop 2000c spectrometer (Thermo Scientific) was used for recording UV-Vis absorption spectra and quantification of the products. FluoroMax-4 (HORIBA Jobin Yvon) luminescence spectrometer and Cytation 5 (Biotek) plate reader were used for the measurement of the phosphorescence emission spectra. Peptide purification was performed with Shimadzu LC Solution (Prominence) HPLC system by using a manual injector and a diode array (SPD M20A) detector.

Full length protein kinases, PIM-1, PIM-2, PIM-3<sup>1,2</sup> and PKAc<sup>3</sup> were produced as described previously.

### Binding assays

Biochemical assays were performed on black, low-volume, 384-well, nonbonding surface (NBS) microplates (code 3676, Corning) on a PHERAstar (BMG Labtech) plate reader using TRF or FP modules. The concentration of ARC-3157 and ARC-3160 was determined on the NanoDrop 2000c spectrometer (Thermo Scientific) using the molar absorption coefficient of  $5700\text{ M}^{-1}\text{cm}^{-1}$ . The concentration of PromoFluor-555 and PromoFluor-647 labelled compounds were determined using the molar absorption coefficient of  $150,000\text{ M}^{-1}\text{cm}^{-1}$  and  $250,000\text{ M}^{-1}\text{cm}^{-1}$ , respectively.

The concentration of the active form of the PK and  $K_D$  values of the probes were determined in binding assays using either (or both) FA<sup>4</sup> or TRF<sup>5,6</sup> read out. Briefly, the PK was two-fold serial diluted in the assay buffer (50 mM HEPES, 150 mM NaCl, 0.005% Tween 20, 5 mM DTT and 0.5 mg/ml BSA) in a row of wells of a microplate and the probe was added to the dilution series at a concentration of 1 nM, 2 nM or 10 nM, depending on the measurement. Thereafter the plate was incubated at 30 °C for 20 min and the signal was determined in FA and/or TRF mode, depending on the probe. The signal was plotted against concentration of the PK and the data were fit into equations described previously to calculate concentration of the PK or  $K_D$  value of the probe.<sup>4</sup> The probe ARC-3117<sup>7</sup> was used for the determination of

concentration of the active forms of PIM kinases in samples in the binding assay with fluorescence anisotropy read out.

## 2. Synthesis

### Synthesis of 3-amino-5-bromobenzo[b]selenophene-2-carboxylic acid ethyl ester (1)

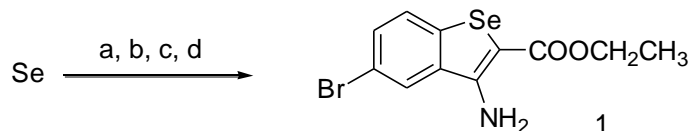

- a)  $\text{NaBH}_4/\text{H}_2\text{O}$ ,  $0^\circ\text{C}$ , b) 5-Bromo-2-fluorobenzonitrile, DMF,  $0^\circ\text{C}$ - $20^\circ\text{C}$   
 c)  $\text{BrCH}_2\text{COOCH}_2\text{CH}_3$ ,  $0^\circ\text{C}$ - $20^\circ\text{C}$ , d) 4M NaOH,  $0$ - $60^\circ\text{C}$

Selenium (195 mg, 2.47 mmol) and sodium borohydride (232 mg, 6.14 mmol) were suspended in water (0.9 mL) at  $0^\circ\text{C}$ . A solution of 5-bromo-2-fluorobenzonitrile (156 mg, 0.78 mmol) in DMF (5 mL) was added at  $0^\circ\text{C}$  to the formed suspension of sodium selenide and thereafter the mixture was stirred for 2 h at room temperature. Then ethyl bromoacetate (250  $\mu\text{L}$ , 2.26 mmol) was added dropwise to the reaction mixture at  $0^\circ\text{C}$  and the stirring was continued at room temperature. After 2 h a solution of 4 M sodium hydroxide (300  $\mu\text{L}$ ) was added dropwise and the mixture was stirred 3 h at  $60^\circ\text{C}$ . The mixture was poured into cold water and solution was extracted with ethyl acetate. The organic layer was washed with water and dried over sodium sulfate. The solution was filtered and the solvent was evaporated. The residue was purified by column chromatography (chloroform/hexane, 3/2). The blue fluorescent spot with  $R_f = 0.25$  was collected to obtain the product (32 mg, 12%) as a yellowish solid.  $\text{UV}_{\text{max}}$  at 288 nm and at 373 nm (DMF). ESI-HRMS  $m/z$ , calcd for  $\text{C}_{11}\text{H}_{10}\text{BrNO}_2\text{Se}$   $[\text{M}+\text{H}]^+$  347.9133, found 347.9127.

$^1\text{H}$  NMR (200 MHz,  $\text{CDCl}_3$ )  $\delta$  1.38 (3H, t,  $J = 7.2$  Hz), 4.33 (2H, q,  $J = 7.2$  Hz), 5.96 (2H, br), 7.52 (1H, dd,  $J = 8.4$  and 1.8 Hz), 7.66 (1H, d,  $J = 8.4$  Hz), 7.75 (1H, d,  $J = 1.8$  Hz).

$^{13}\text{C}$  NMR (50 MHz,  $\text{CDCl}_3$ )  $\delta$  14.5, 60.7, 99.7, 118.5, 125.8, 128.0, 131.1, 136.2, 138.5, 149.1, 166.3.

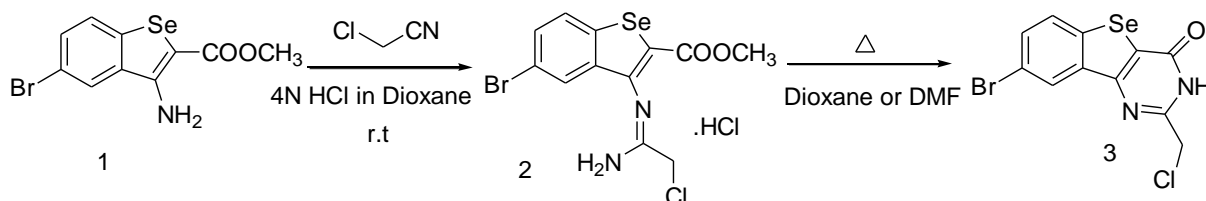

### Synthesis of 2-(chloromethyl)-seleno[2,3-d]pyrimidin-4(3H)-one (3)

A suspension of 3-amino-5-bromobenzo[b]selenophene-2-carboxylic acid ethyl ester (0.1 g, 0.3 mmol) in 4 N hydrochloric acid in dioxane (5 mL) was treated with 2-chloroacetonitrile

(37  $\mu$ l, 0.6 mmol) at room temperature for 3 h and then the solvent was removed. The residual solid was refluxed with dry dioxane for 2 h, collected by filtration, washed with ethanol and dried to give the desired product in 65 % yield. ESI-HRMS  $m/z$ , calculated for  $C_{11}H_6BrClN_2OSe$   $[M+H]^+$  376.8590, found 376.8579.

$^1H$  NMR (700 MHz,  $DMSO_{6d}$ )  $\delta$  4.66 (2H, s), 7.77 (1H, dd,  $J = 8.6$  and  $2.1$  Hz), 8.24 (1H, d,  $J = 8.6$  Hz), 8.31 (1H, d,  $J = 2.1$  Hz), 13.17 (1H, br).

$^{13}C$  NMR (234 MHz,  $DMSO_{6d}$ )  $\delta$  42.8, 119.2, 125.8, 127.2, 129.4, 131.7, 138.4, 139.9, 154.0, 155.5, 159.6.

### **Synthesis of peptide conjugates**

Peptide fragments were prepared by using traditional Fmoc solid-phase peptide synthesis on Rink-amide MBHA resin. In general, protected amino acids (3 eq.) were dissolved in DMF and activated with HBTU/HOBt (2.8 eq. each) in the presence of *N*-methylmorpholine (9 eq.). After 3 minute coupling the solutions were added to the resin. After 1 h shaking the resin was washed 5-fold with DMF. The completeness of each coupling step was monitored with the Kaiser test. The *N*-terminal Fmoc group was removed with 20 % piperidine solution in DMF (20 min) and thereafter the resin was washed 5 times with DMF.

A solution of 2-(chloromethyl)-seleno[2,3-*d*]pyrimidin-4(3*H*)-one (3 eq.) in DMF and DIPEA (9 eq.) was added to *N*-terminal amino group of the corresponding peptide on the resin and the mixture was stirred slowly at 60 °C for 8 h.

Finally the resin was washed 5-fold with each solvent (DMF, isopropanol, DCE) and dried. The protection groups were removed and the conjugates cleaved from the resin by 2 h treatment with 90 % trifluoroacetic acid, 5 % triisopropylsilane, 5 % water. The conjugates were purified with C18 reversed phase HPLC and lyophilized.

### **Labelling of peptide conjugates with the fluorescent dye PromoFlour-647**

Lysine-containing peptide conjugate (ARC-3157, ARC-3160) and NHS ester of PromoFlour-647 or PromoFlour-555 fluorescence dye were dissolved in DMSO and  $Et_3N$ . After 3 h reaction the solvents were removed in the freeze dryer and the products were purified by HPLC with C18 reverse phase column to yield ARC-3158, ARC-3159 and ARC-3161.

#### 4. Structures and HRMS data

**Table S1. Structures and HRMS data of novel compounds**

Structures and HRMS data of compounds reported in this study. Deconvoluted monoisotopic mass is presented

| Compound | Structure                                                                                                                                                                                                                                                   | HRMS found |
|----------|-------------------------------------------------------------------------------------------------------------------------------------------------------------------------------------------------------------------------------------------------------------|------------|
| ARC-3157 | 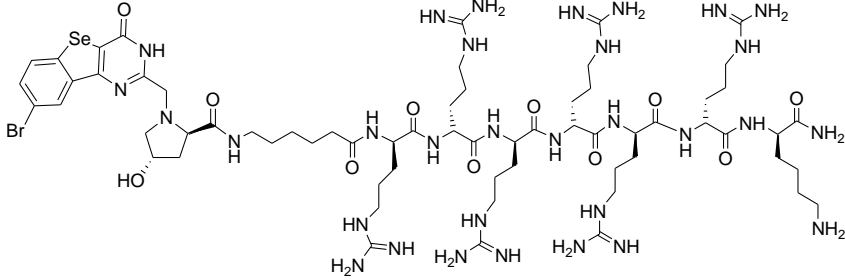 <p data-bbox="671 853 919 931"> <math>C_{64}H_{110}BrN_{31}O_{11}Se</math><br/>           Exact Mass: 1647,73496<br/>           Mol. Wt.: 1648,62330         </p>        | 1647.73973 |
| ARC-3158 |  <p data-bbox="619 1227 839 1294"> <math>C_{96}H_{146}BrN_{33}O_{18}S_2Se</math><br/>           Exact Mass: 2271,93136<br/>           Mol. Wt.: 2273,39074         </p>  | 2271.9312  |
| ARC-3159 |  <p data-bbox="579 1637 775 1697"> <math>C_{94}H_{144}BrN_{33}O_{18}S_2Se</math><br/>           Exact Mass: 2245,91571<br/>           Mol. Wt.: 2247,35678         </p> | 2245.9143  |
| ARC-3160 |  <p data-bbox="480 1944 639 1995"> <math>C_{82}H_{146}BrN_{43}O_{14}Se</math><br/>           Exact Mass: 2116,03830<br/>           Mol. Wt.: 2117,18034         </p>    | 2116.04260 |

|                        |                                                                                                                                                                                                                              |                   |
|------------------------|------------------------------------------------------------------------------------------------------------------------------------------------------------------------------------------------------------------------------|-------------------|
| <p><b>ARC-3161</b></p> | 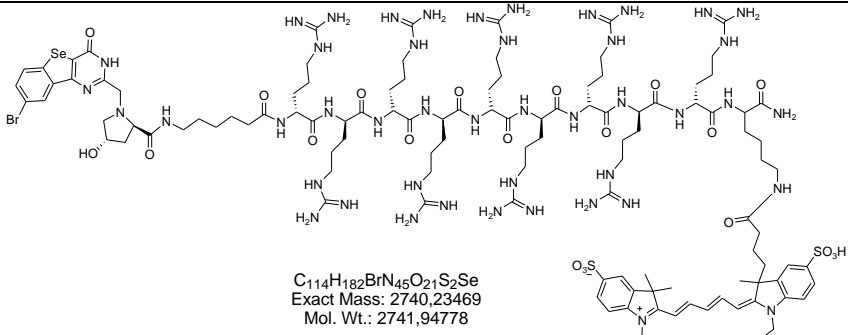 <p> <math>C_{114}H_{182}BrN_{45}O_{21}S_2Se</math><br/>           Exact Mass: 2740,23469<br/>           Mol. Wt.: 2741,94778         </p> | <p>2740.24042</p> |
|------------------------|------------------------------------------------------------------------------------------------------------------------------------------------------------------------------------------------------------------------------|-------------------|

**Table S2. Structures of previously reported compounds**

| Compound               | Structure                                                                                                                                                                                                                    | Reference  |
|------------------------|------------------------------------------------------------------------------------------------------------------------------------------------------------------------------------------------------------------------------|------------|
| <p><b>ARC-3104</b></p> | 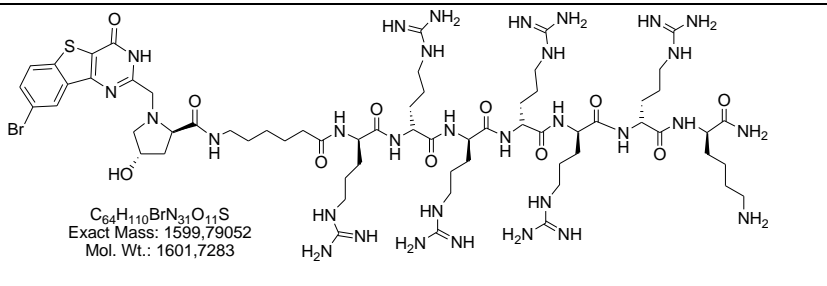 <p> <math>C_{64}H_{110}BrN_{31}O_{11}S</math><br/>           Exact Mass: 1599,79052<br/>           Mol. Wt.: 1601,7283         </p>      | <p>(7)</p> |
| <p><b>ARC-3117</b></p> |  <p> <math>C_{96}H_{146}BrN_{33}O_{18}S_3</math><br/>           Exact Mass: 2223,98691<br/>           Mol. Wt.: 2226,49574         </p>  | <p>(7)</p> |
| <p><b>ARC-1139</b></p> |  <p> <math>C_{101}H_{162}N_{38}O_{18}S_2Se</math><br/>           Exact Mass: 2339,15359<br/>           Mol. Wt.: 2339,70430         </p> | <p>(6)</p> |

## 4. NMR Spectra

$^1\text{H}$  NMR spectrum of 3-amino-5-bromobenzo[b]selenophene-2-carboxylic acid ethyl ester. (1)

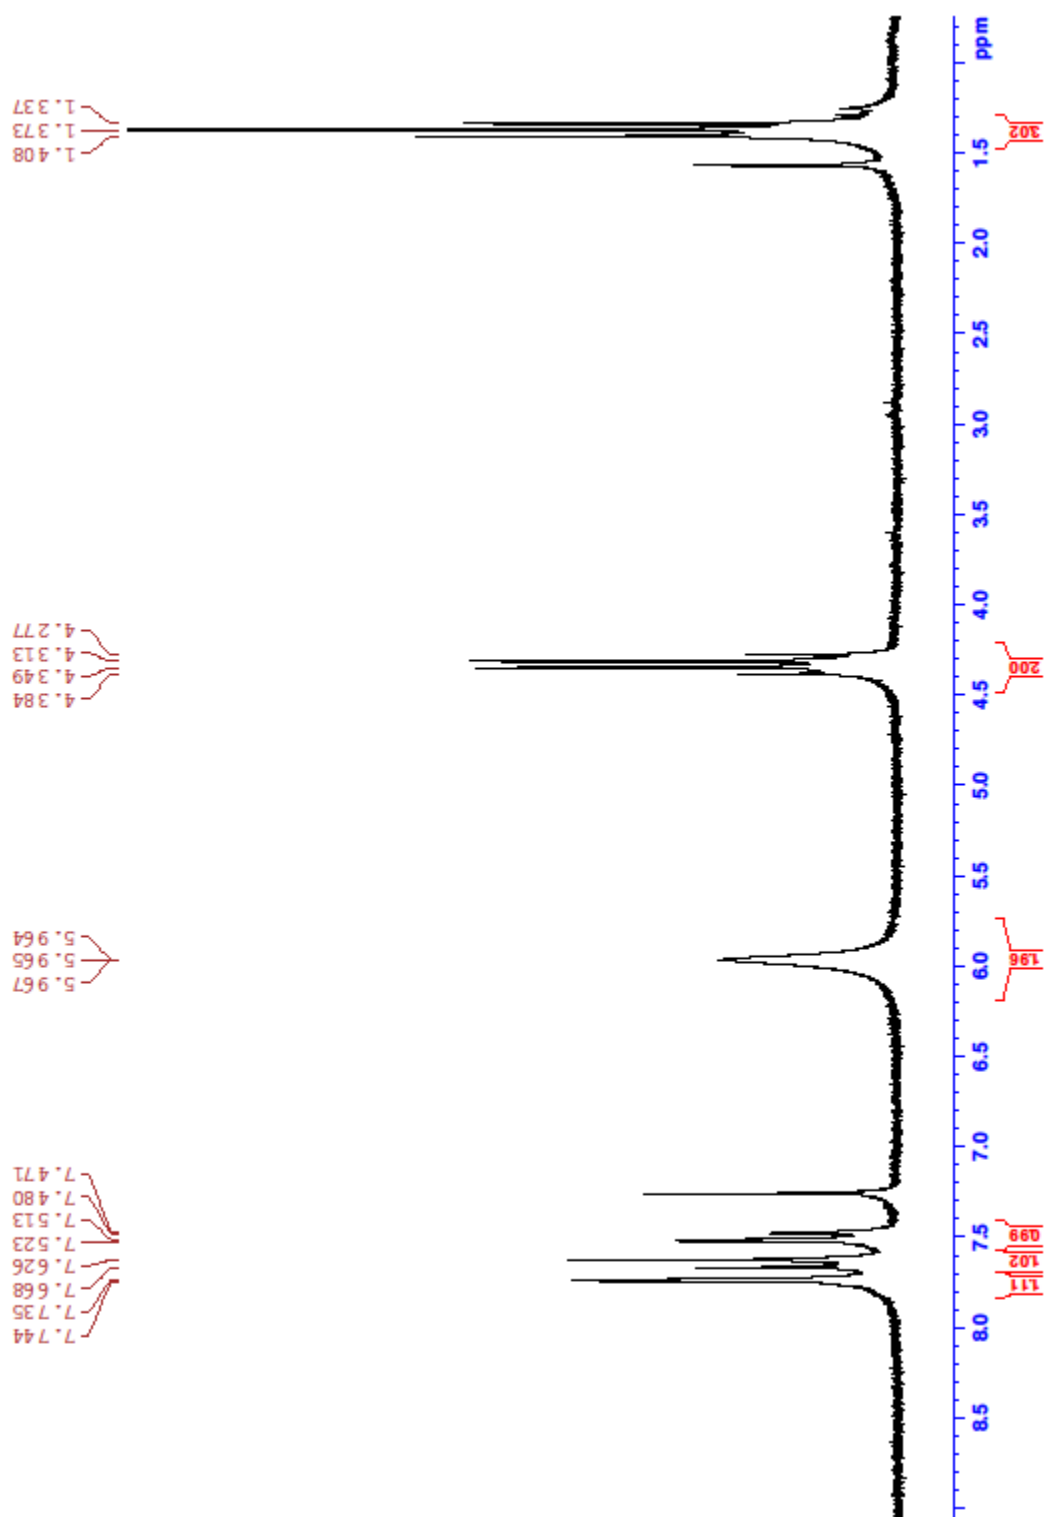

$^{13}\text{C}$  spectrum of 3-amino-5-bromobenzo[b]selenophene-2-carboxylic acid ethyl ester. (1)

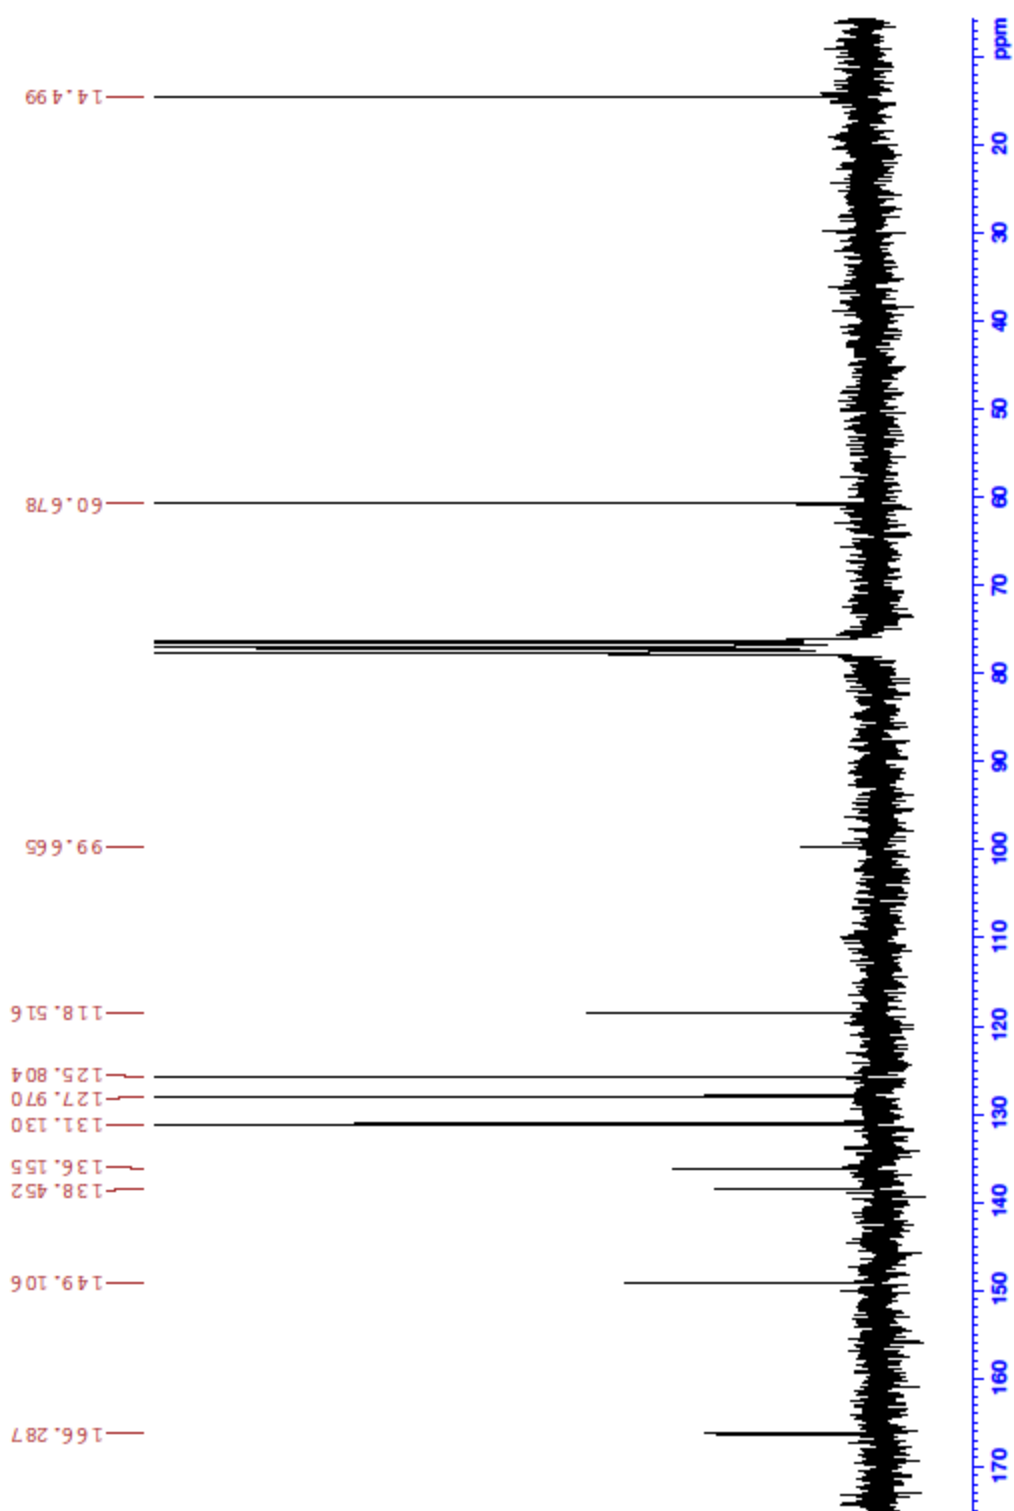



$^1\text{H}$  spectrum of 2-(chloromethyl)-seleno[2,3-d]pyrimidin-4(3H)-one. (3)

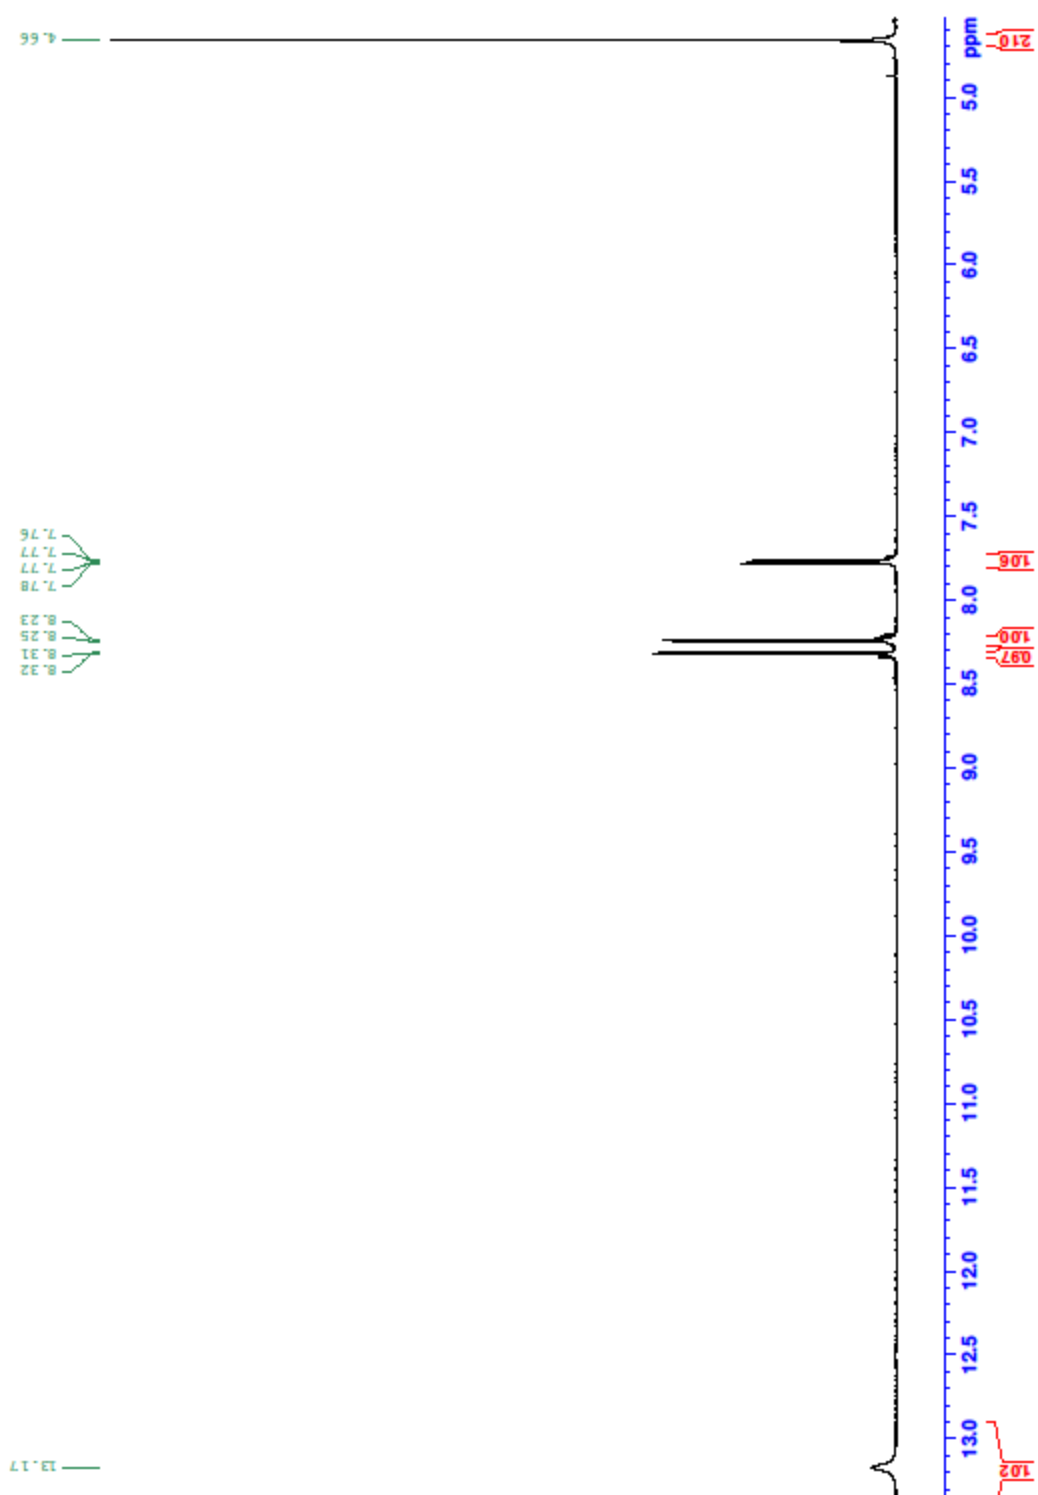

$^{13}\text{C}$  spectrum of 2-(chloromethyl)-seleno[2,3-d]pyrimidin-4(3H)-one. (3)

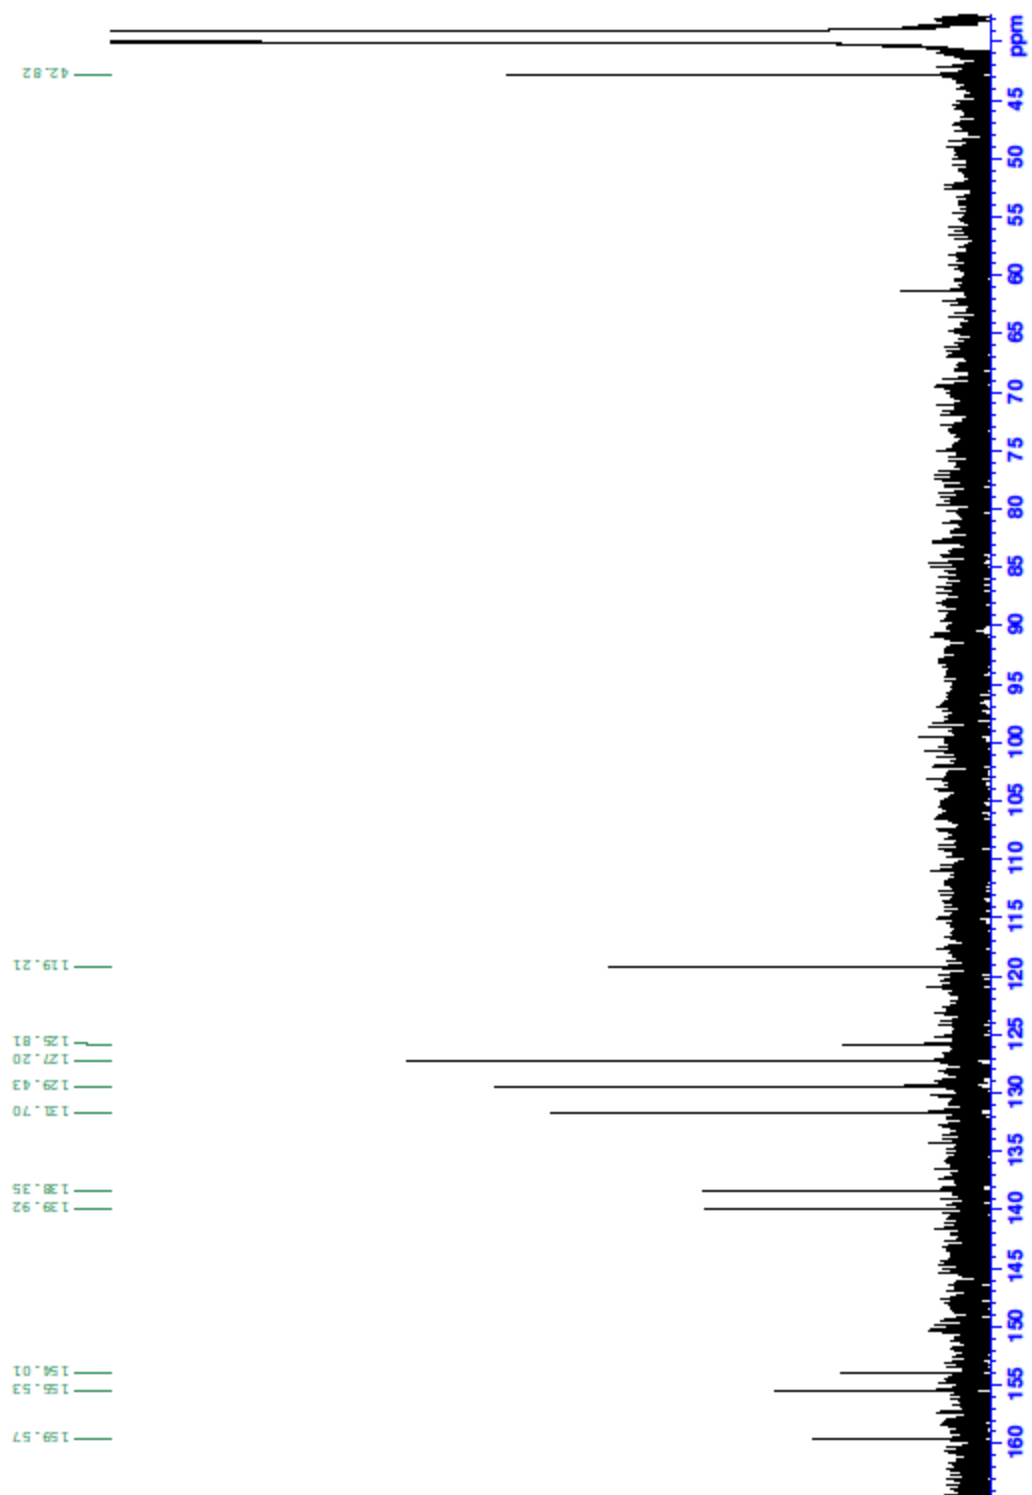

## 5. HPLC data of purified compounds

Purification of the compounds was performed with Shimadzu LC Solution (Prominence) HPLC system by using a manual injector and a diode array detector (SPM 20A). Separation was achieved with a Gemini C18 column (250X4.6, Phenomenex). Mobile phase was made up from solutions A (0.1 %TFA) and solution B (0.1%TFA in ACN). Elution flow rate was 1 ml/min. Linear gradient and elution were started at 3 min (injection time was also at 3 min) with % ACN as specified in the table.

| Compound | Molecular formula                                                                     | Gradient speed<br>Pump B ACN% | Retention time<br>tR (min) | HPLC area<br>purity% |
|----------|---------------------------------------------------------------------------------------|-------------------------------|----------------------------|----------------------|
| ARC-3157 | C <sub>64</sub> H <sub>110</sub> BrN <sub>31</sub> O <sub>11</sub> Se                 | 10%-40%/30 min                | 14.5                       | 100                  |
| ARC-3158 | C <sub>96</sub> H <sub>146</sub> BrN <sub>33</sub> O <sub>18</sub> S <sub>2</sub> Se  | 10%-60%/30 min                | 16.4                       | 96.5                 |
| ARC-3159 | C <sub>94</sub> H <sub>144</sub> BrN <sub>33</sub> O <sub>11</sub> Se                 | 10%-80%/30 min                | 12.9                       | 95                   |
| ARC-3160 | C <sub>82</sub> H <sub>146</sub> BrN <sub>43</sub> O <sub>14</sub> Se                 | 10%-60%/30 min                | 12.9                       | 92.4                 |
| ARC-3161 | C <sub>114</sub> H <sub>182</sub> BrN <sub>45</sub> O <sub>21</sub> S <sub>2</sub> Se | 10%-80%/30 min                | 13.4                       | 98.7                 |

## 6. References

- (1) A. N. Bullock, J. Debreczeni, A. L. Amos, S. Knapp and B. E. Turk, Structure and substrate specificity of the PIM-1 kinase, *The Journal of biological chemistry*, 2005, **280**, 41675-41682.
- (2) L. Harrington, S. Cheley, L. T. Alexander, S. Knapp and H. Bayley, Stochastic detection of PIM protein kinases reveals electrostatically enhanced association of a peptide substrate, *Proceedings of the National Academy of Sciences of the United States of America*, 2013, **110**, E4417-E4426.
- (3) A. Pflug, J. Rogozina, D. Lavogina, E. Enkvist, A. Uri, R. A. Engh and D. Bossemeyer, Diversity of bisubstrate binding modes of adenosine analogue-oligoarginine conjugates in protein kinase a and implications for protein substrate interactions, *Journal of molecular biology*, 2010, **403**, 66-77.
- (4) A. Vaasa, I. Viil, E. Enkvist, K. Viht, G. Raidaru, D. Lavogina and A. Uri, High-affinity bisubstrate probe for fluorescence anisotropy binding/displacement assays with protein kinases PKA and ROCK, *Analytical biochemistry*, 2009, **385**, 85-93.
- (5) R. Ekambaram, E. Enkvist, G. Manoharan, M. Ugandi, M. Kasari, K. Viht, S. Knapp, O. G. Issinger and A. Uri, Benzoselenadiazole-based responsive long-lifetime

photoluminescent probes for protein kinases, *Chemical communications*, 2014, **50**, 4096-4098.

(6) E. Enkvist, A. Vaasa, M. Kasari, M. Kriisa, T. Ivan, K. Ligi, G. Raidaru and A. Uri, Protein-induced long lifetime luminescence of nonmetal probes, *ACS chemical biology*, 2011, **6**, 1052-1062.

(7) R. Ekambaram, E. Enkvist, A. Vaasa, M. Kasari, G. Raidaru, S. Knapp and A. Uri, Selective bisubstrate inhibitors with sub-nanomolar affinity for protein kinase PIM-1, *ChemMedChem*, 2013, **8**, 909-913.
